# Supplementary material for: Evaluation of E-Health Applications for Paediatric Patients with Refractory Epilepsy and Maintained on Ketogenic Diet
Source: MDPI journal article supplement (doi:10.3390/nu13041240), 2021-04-09
Supplement: s1 [file s1]

**Information satisfaction questionnaire (ISQ) on the caregiver informative materials about the ketogenic diet**

**FIRST SECTION – General information**

**1. Gender and age of the survey participant:**

- Female
- Male
- Both parents are participating in the survey

Age range:

- 30-40
- 40-50
- 50-60
- >60

**2. Number of children in the family:**

- 1
- 2
- 3
- >3

**3. Age of the child on the ketogenic diet:**

- 0-3 years old
- 4-6 years old
- 7-9 years old
- 10-13 years old
- 14-17 years old

**4. Gender of the child on the ketogenic diet:**

- Male
- Female

**5. Name of the hospital tracking the child:**

- Pavia
- Roma
- Bologna
- Firenze
- Modena

**6. Is your child still treated with the ketogenic diet?**

- Yes → duration of the treatment: \_\_\_\_\_
- No, my child was treated with the ketogenic diet in the past → duration of the treatment: \_\_\_\_\_

**7. Who is/was the person in charge of implementing the diet at home?**

- Mother
- Father
- Both
- \_\_\_\_\_

**8. Do you have access to the internet?**

- Yes, always
- Yes, at least once a week
- Yes, sometimes
- No

**SECOND SECTION – Where did you find preliminary information about the ketogenic diet?**

**1. Where did you find preliminary information about this diet? (choose one or more options):**

- Websites
- Social Media
- Hospital/health professionals
- Word of mouth
- Booklets/leaflets
- Other (please specify)

**2. Where did you find preliminary information about the hospitals offering the ketogenic diet protocol, before contacting a specialized centre? (choose one or more options):**

- Websites
- Social Media
- Hospital/health professionals
- Word of mouth
- Booklets/leaflets
- Other (please specify)

**3. Which kind of informative materials were provided by the hospital where your children were/are under treatment? (choose one or more options):**

- Paper-based materials produced by the hospital
- Paper-based materials produced by pharmaceutical companies
- Website
- App
- Videos
- Other (please specify)

**THIRD SECTION – Can you evaluate the informative materials on the ketogenic diet given by the centre that follows your child?**

How much are you IN AGREEMENT or DISAGREEMENT with the following sentences? Circle a number from 1 (strongly disagree) to 5 (strongly agree).

| INFORMATIVE MATERIAL |                                                                                                                   | Strongly disagree | Disagree | I do not Know | Agree | Strongly Agree |
|----------------------|-------------------------------------------------------------------------------------------------------------------|-------------------|----------|---------------|-------|----------------|
| Booklets/leaflets    | The booklets/leaflets are readable                                                                                | 1                 | 2        | 3             | 4     | 5              |
|                      | The booklets/leaflets include comprehensive information                                                           | 1                 | 2        | 3             | 4     | 5              |
|                      | The booklets/leaflets include all the preliminary data to help choose the treatment                               | 1                 | 2        | 3             | 4     | 5              |
|                      | The booklets/leaflets include all the information for the management of the diet (recipes, etc.)                  | 1                 | 2        | 3             | 4     | 5              |
|                      | The booklets/leaflets include all the information about the benefits of the diet (in the short and long term)     | 1                 | 2        | 3             | 4     | 5              |
|                      | The booklets/leaflets include all the information about the side effects of the diet (in the short and long term) | 1                 | 2        | 3             | 4     | 5              |
|                      | The booklets/leaflets include all the information about when and how to call specialists in case of need          | 1                 | 2        | 3             | 4     | 5              |
|                      | The booklets/leaflets are useful tools in motivating families to choose the ketogenic diet                        | 1                 | 2        | 3             | 4     | 5              |
|                      | My confidence in the dietary treatment has increased after having access to this informative material             | 1                 | 2        | 3             | 4     | 5              |

|         |                                                                                                          |   |   |   |   |   |
|---------|----------------------------------------------------------------------------------------------------------|---|---|---|---|---|
| Website | The website includes comprehensive information                                                           | 1 | 2 | 3 | 4 | 5 |
|         | The graphic image on the website facilitates access to the information                                   | 1 | 2 | 3 | 4 | 5 |
|         | The website is easy to navigate                                                                          | 1 | 2 | 3 | 4 | 5 |
|         | The website contains adequate language to be understood by people of different educational levels        | 1 | 2 | 3 | 4 | 5 |
|         | The website includes all the preliminary data to help choose the treatment                               | 1 | 2 | 3 | 4 | 5 |
|         | The website includes all the information for the management of the diet (recipes, etc.)                  | 1 | 2 | 3 | 4 | 5 |
|         | The website includes all the information about the benefits of the diet (in the short and long term)     | 1 | 2 | 3 | 4 | 5 |
|         | The website includes all the information about the side effects of the diet (in the short and long term) | 1 | 2 | 3 | 4 | 5 |
|         | The website includes all the information about when and how to call specialists in case of need          | 1 | 2 | 3 | 4 | 5 |
|         | The website is a useful tool in motivating families to choose the ketogenic diet                         | 1 | 2 | 3 | 4 | 5 |
|         | My confidence in the dietary treatment has increased after having access to this informative material    | 1 | 2 | 3 | 4 | 5 |

|                  |                                                                                                                             |   |   |   |   |   |
|------------------|-----------------------------------------------------------------------------------------------------------------------------|---|---|---|---|---|
| App              | The app includes readable information                                                                                       | 1 | 2 | 3 | 4 | 5 |
|                  | The app includes comprehensive information                                                                                  | 1 | 2 | 3 | 4 | 5 |
|                  | The graphic image on the app facilitates access to the information                                                          | 1 | 2 | 3 | 4 | 5 |
|                  | The app is easy to navigate                                                                                                 | 1 | 2 | 3 | 4 | 5 |
|                  | The app is easy to use with different devices (smartphone, tablet, and computer)                                            | 1 | 2 | 3 | 4 | 5 |
|                  | The app contains adequate language to be understood by people of different educational levels                               | 1 | 2 | 3 | 4 | 5 |
|                  | The app facilitates dietary management in everyday life                                                                     | 1 | 2 | 3 | 4 | 5 |
|                  | The app facilitates dietary management in public places                                                                     | 1 | 2 | 3 | 4 | 5 |
|                  | The app includes all the information about when and how to call specialists in case of need                                 | 1 | 2 | 3 | 4 | 5 |
|                  | The app is a useful tool in motivating families to choose the ketogenic diet                                                | 1 | 2 | 3 | 4 | 5 |
|                  | My confidence in the dietary treatment has increased after having access to this informative material                       | 1 | 2 | 3 | 4 | 5 |
| Overall material | I am overall satisfied with the informative materials provided by the hospital                                              | 1 | 2 | 3 | 4 | 5 |
|                  | The informative materials have changed our attitude on the treatment in a positive way                                      | 1 | 2 | 3 | 4 | 5 |
|                  | The informative material has made us become more aware of the management of the diet                                        | 1 | 2 | 3 | 4 | 5 |
|                  | The informative materials has stimulated us to continue with the diet                                                       | 1 | 2 | 3 | 4 | 5 |
|                  | The information received has helped us explain the ketogenic diet to our children                                           | 1 | 2 | 3 | 4 | 5 |
|                  | The information received has helped us to explain the ketogenic diet to other people involved in the management of the diet | 1 | 2 | 3 | 4 | 5 |
|                  | I would use the informative materials to help another family choose the ketogenic diet.                                     | 1 | 2 | 3 | 4 | 5 |

**FOURTH SECTION – Suggestions to improve the information for families**

**1. What would you suggest improving in the materials you had received?**

---

---

---

---

---

---

---

**2. What extra information would you have liked to receive?**

---

---

---

---

---

---

---

**3. What was the most and the least useful thing in the informative texts you were given?**

---

---

---

---

---

---

---

**4. What medium of communication did you consider the most valuable among those cited in the questionnaire?** (website, app, videos, paper-based materials produced by the hospital, and paper-based materials produced by pharmaceutical companies)

---

---

---

---

---

---

---

\*This is the translated version of the Italian questionnaire published by Cavalieri et al. (2019).
